# Supplementary figures and images for: Transcriptional Analysis of Coccidioides immitis Mycelia and Spherules by RNA Sequencing
Source: MDPI journal article supplement (doi:10.3390/jof7050366), 2021-05-07

# Spherule/Mycelia Fold Change (log 2)

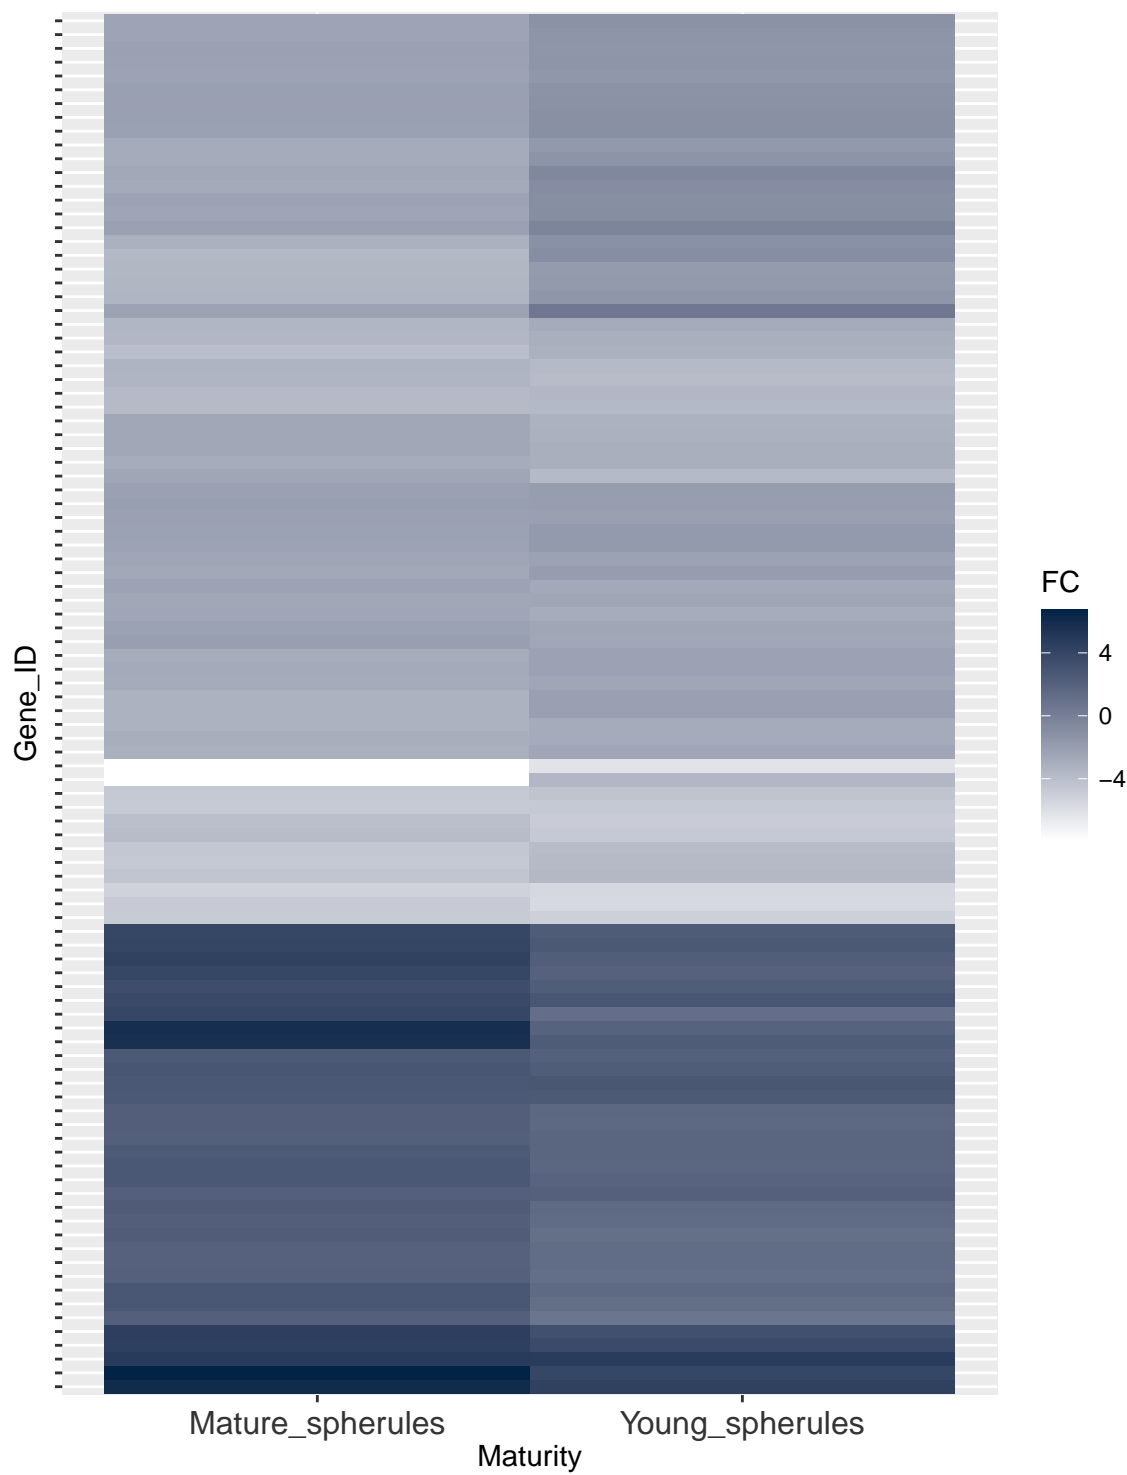

Supplement: s1 [file s1]
